# Supplementary material for: Enhanced oxygen electrode performance in solid oxide fuel cells via La-doping of Pr2NiO4+δ-based Ruddlesden–Popper perovskites
Source: Royal Society of Chemistry journal article supplement (doi:10.1039/d4tc03740e), 2024-01-01
Supplement: d4tc03740e1.pdf [file d4tc03740e1.pdf]

## **Enhanced oxygen electrode performance in solid oxide fuel cells via La-doping of Pr<sub>2</sub>NiO<sub>4+δ</sub>-based Ruddlesden-Popper perovskites**

Zihao Liao <sup>a</sup>, Yiping Yang <sup>a</sup>, Dingrong Ou <sup>a</sup>, Yuan Tang <sup>a</sup>, Bo Wang <sup>a</sup>, Binbin He <sup>a</sup>, Yu Zeng <sup>b</sup>, Yunfeng Tian <sup>c\*</sup>, Bo Chi <sup>b</sup>

a. Guangzhou Power Supply Bureau, Guangdong Power Grid Co., Ltd, Guangzhou, 510620, PR China

b. School of Materials Science and Engineering, State Key Laboratory of Material Processing and Die & Mould Technology, Huazhong University of Science & Technology, Wuhan, Hubei 430074, PR China

c. School of Materials Science and Physics, China University of Mining and Technology, Xuzhou 221116, PR China

Corresponding author. Dr. Yunfeng Tian

E-mail: [yunfengup@cumt.edu.cn](mailto:yunfengup@cumt.edu.cn)

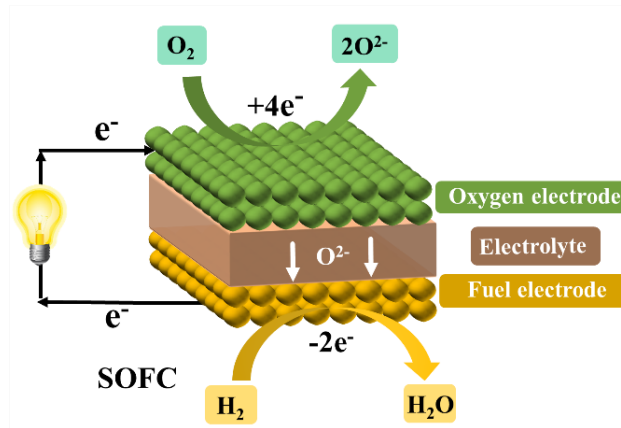

Fig. S1 Diagram of the structure and working principle of the SOFC.

Table S1 Rietveld fitting results for  $\text{Pr}_{2-x}\text{La}_x\text{Ni}_{0.8}\text{Cu}_{0.2}\text{O}_{4+\delta}$  ( $x=0, 0.5, 1.0$ ).

| Sample               | a (Å) | b (Å) | c (Å)  | Volume(Å <sup>3</sup> ) | Chi <sup>2</sup> | Crystal system   | Space groups         |
|----------------------|-------|-------|--------|-------------------------|------------------|------------------|----------------------|
| PNC                  | 5.431 | 5.403 | 12.531 | 367.69                  | 1.77             | Orthorhom<br>bic | Fmmm                 |
| PL <sub>0.5</sub> NC | 5.425 | 5.425 | 12.585 | 370.35                  | 1.62             | Tetragonal       | P4 <sub>2</sub> /ncm |
| PL <sub>1.0</sub> NC | 5.432 | 5.432 | 12.647 | 373.17                  | 1.38             | Tetragonal       | P4 <sub>2</sub> /ncm |

Table S2. Thermal expansion coefficients of PNC, PL<sub>0.5</sub>NC, PL<sub>1.0</sub>NC and common electrolyte.

|                                         | PNC   | PL <sub>0.5</sub> NC | PL <sub>1.0</sub> NC | YSZ   | LSGM  | GDC   | SDC   |
|-----------------------------------------|-------|----------------------|----------------------|-------|-------|-------|-------|
| TEC(*10 <sup>-6</sup> K <sup>-1</sup> ) | 13.55 | 14.04                | 13.89                | 14.58 | 12.13 | 12.39 | 11.42 |

Table S3. ECR equilibration time of PNC, PL<sub>0.5</sub>NC and PL<sub>1.0</sub>NC.

| Sample               | 650 °C | 700 °C | 750 °C | 800 °C |
|----------------------|--------|--------|--------|--------|
| PNC                  | 723 s  | 480 s  | 359 s  | 287 s  |
| PL <sub>0.5</sub> NC | 522 s  | 342 s  | 258 s  | 208 s  |
| PL <sub>1.0</sub> NC | 630 s  | 433 s  | 284 s  | 223 s  |

Table S4. Oxygen surface exchange coefficient of PNC, PL<sub>0.5</sub>NC and PL<sub>1.0</sub>NC.

| Sample                                     | 650 °C                | 700 °C                | 750 °C                | 800 °C                |
|--------------------------------------------|-----------------------|-----------------------|-----------------------|-----------------------|
| PNC (cm·s <sup>-1</sup> )                  | 2.45×10 <sup>-3</sup> | 5.71×10 <sup>-3</sup> | 5.07×10 <sup>-3</sup> | 7.84×10 <sup>-3</sup> |
| PL <sub>0.5</sub> NC (cm·s <sup>-1</sup> ) | 3.90×10 <sup>-3</sup> | 7.85×10 <sup>-3</sup> | 8.62×10 <sup>-3</sup> | 9.80×10 <sup>-3</sup> |
| PL <sub>1.0</sub> NC (cm·s <sup>-1</sup> ) | 3.76×10 <sup>-3</sup> | 4.73×10 <sup>-3</sup> | 7.11×10 <sup>-3</sup> | 7.96×10 <sup>-3</sup> |

Table S5. Oxygen bulk diffusion coefficient of PNC, PL<sub>0.5</sub>NC and PL<sub>1.0</sub>NC.

| Sample                                                   | 650 °C                | 700 °C                | 750 °C                | 800 °C                |
|----------------------------------------------------------|-----------------------|-----------------------|-----------------------|-----------------------|
| PNC (cm <sup>2</sup> ·s <sup>-1</sup> )                  | 3.05×10 <sup>-4</sup> | 3.13×10 <sup>-4</sup> | 6.0×10 <sup>-4</sup>  | 6.2×10 <sup>-4</sup>  |
| PL <sub>0.5</sub> NC (cm <sup>2</sup> ·s <sup>-1</sup> ) | 3.15×10 <sup>-4</sup> | 4.32×10 <sup>-4</sup> | 6.5×10 <sup>-4</sup>  | 7.78×10 <sup>-4</sup> |
| PL <sub>1.0</sub> NC (cm <sup>2</sup> ·s <sup>-1</sup> ) | 2.67×10 <sup>-4</sup> | 3.01×10 <sup>-4</sup> | 3.73×10 <sup>-4</sup> | 6.63×10 <sup>-4</sup> |

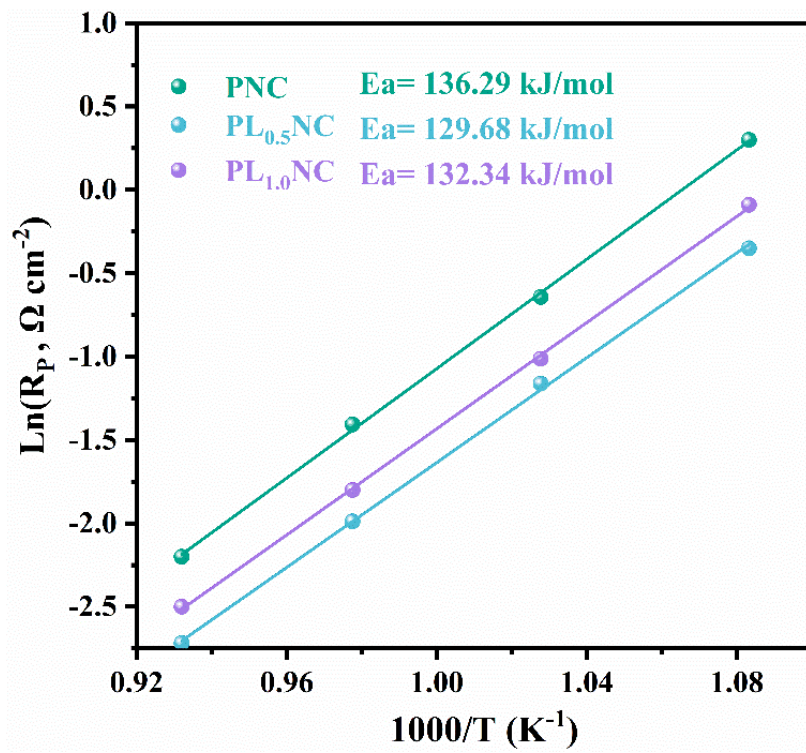

Fig. S2. Arrhenius plots of PNC,  $\text{PL}_{0.5}\text{NC}$  and  $\text{PL}_{1.0}\text{NC}$  electrodes.



Table S6. Impedances and peak power densities of different oxygen electrode  $\text{Pr}_2\text{-}_x\text{La}_x\text{Ni}_{0.8}\text{Cu}_{0.2}\text{O}_{4+\delta}$  ( $x=0, 0.5, 1.0$ ) single cells in SOFC mode.

| Oxygen electrode           | Performance                            | 650 °C | 700 °C | 750 °C | 800 °C |
|----------------------------|----------------------------------------|--------|--------|--------|--------|
| PNC                        | $R_{\Omega}$ ( $\Omega \text{ cm}^2$ ) | 0.591  | 0.415  | 0.310  | 0.234  |
|                            | $R_p$ ( $\Omega \text{ cm}^2$ )        | 1.933  | 1.375  | 0.655  | 0.272  |
|                            | PPD ( $\text{mW cm}^{-2}$ )            | 124    | 216    | 341    | 528    |
| $\text{PL}_{0.5}\text{NC}$ | $R_{\Omega}$ ( $\Omega \text{ cm}^2$ ) | 0.564  | 0.385  | 0.288  | 0.245  |
|                            | $R_p$ ( $\Omega \text{ cm}^2$ )        | 0.965  | 0.452  | 0.263  | 0.189  |
|                            | PPD ( $\text{mW cm}^{-2}$ )            | 317    | 467    | 649    | 864    |
| $\text{PL}_{1.0}\text{NC}$ | $R_{\Omega}$ ( $\Omega \text{ cm}^2$ ) | 0.587  | 0.405  | 0.297  | 0.240  |
|                            | $R_p$ ( $\Omega \text{ cm}^2$ )        | 1.414  | 0.791  | 0.345  | 0.218  |
|                            | PPD ( $\text{mW cm}^{-2}$ )            | 161    | 272    | 431    | 643    |
